# Supplementary material for: Ecolabel with Augmented Reality on the Website to Enhance Student Environmental Awareness
Source: Hindawi journal article supplement (doi:10.1155/2022/8169849), 2022-06-03
Supplement: f1 [file 8169849.f1.docx]

| **CONTROL CLASS** | | | | | | | | | | | | |  |
| --- | --- | --- | --- | --- | --- | --- | --- | --- | --- | --- | --- | --- | --- |
| Respondent | ENVIRONMENTAL AWARENESS | | | | | | | | | | | | |
| Environmental Practices | | | | Environmental Attitudes | | | | Noble Values of Sustainability | | | | |
| student comprehending the meanings of environmental issues | being in charge of environmental problems at one’s place | discussing about environmental problems with others | getting involved in environmental awareness activities | student feeling dissapointed with air pollution | feeling dissapointed with river pollution | appreciating biodiversity | awaring of being responsibility towards environment | student trying to reduce amount of waste by collecting materials recycled | not using plastic bag to wrap things | conserving the use of electric energy | conserving the use of water supply | composting the food residue to become fertilizer |
| 1 | 5 | 4 | 4 | 5 | 5 | 5 | 5 | 5 | 5 | 5 | 5 | 4 | 4 |
| 2 | 4 | 4 | 5 | 5 | 5 | 5 | 4 | 5 | 5 | 5 | 4 | 5 | 3 |
| 3 | 4 | 4 | 4 | 5 | 5 | 5 | 4 | 5 | 5 | 4 | 5 | 5 | 5 |
| 4 | 5 | 5 | 4 | 5 | 5 | 5 | 4 | 5 | 5 | 3 | 3 | 5 | 5 |
| 5 | 5 | 5 | 3 | 5 | 5 | 5 | 5 | 5 | 5 | 3 | 3 | 5 | 4 |
| 6 | 5 | 5 | 4 | 5 | 5 | 5 | 5 | 5 | 5 | 4 | 4 | 4 | 5 |
| 7 | 5 | 5 | 5 | 5 | 5 | 5 | 3 | 5 | 3 | 3 | 5 | 4 | 4 |
| 8 | 5 | 5 | 5 | 5 | 5 | 5 | 3 | 5 | 3 | 5 | 5 | 4 | 3 |
| 9 | 5 | 5 | 5 | 5 | 5 | 5 | 4 | 4 | 4 | 5 | 5 | 5 | 3 |
| 10 | 5 | 5 | 5 | 5 | 5 | 5 | 5 | 4 | 3 | 4 | 5 | 5 | 4 |
| 11 | 5 | 5 | 5 | 5 | 5 | 4 | 5 | 4 | 5 | 5 | 5 | 5 | 3 |
| 12 | 5 | 5 | 5 | 5 | 5 | 4 | 4 | 4 | 4 | 5 | 5 | 5 | 5 |
| 13 | 4 | 5 | 5 | 5 | 4 | 5 | 4 | 4 | 4 | 4 | 3 | 3 | 5 |
| 14 | 4 | 5 | 5 | 4 | 5 | 5 | 3 | 5 | 4 | 4 | 4 | 4 | 4 |
| 15 | 4 | 5 | 5 | 3 | 3 | 5 | 4 | 5 | 4 | 5 | 3 | 4 | 3 |
| 16 | 5 | 5 | 5 | 3 | 3 | 5 | 5 | 5 | 5 | 5 | 5 | 4 | 3 |
| 17 | 5 | 5 | 4 | 4 | 4 | 4 | 5 | 5 | 4 | 3 | 4 | 5 | 4 |
| 18 | 3 | 5 | 3 | 3 | 5 | 4 | 5 | 5 | 5 | 5 | 4 | 5 | 3 |
| 19 | 3 | 5 | 3 | 5 | 5 | 4 | 5 | 5 | 4 | 4 | 4 | 4 | 5 |
| 20 | 4 | 4 | 4 | 5 | 4 | 4 | 5 | 5 | 5 | 4 | 4 | 4 | 5 |
| 21 | 5 | 4 | 3 | 4 | 4 | 4 | 5 | 5 | 4 | 4 | 5 | 4 | 4 |
| 22 | 5 | 4 | 5 | 5 | 4 | 5 | 5 | 5 | 5 | 4 | 4 | 5 | 5 |
| 23 | 4 | 4 | 5 | 4 | 4 | 4 | 5 | 3 | 4 | 4 | 4 | 4 | 4 |
| 24 | 4 | 4 | 4 | 5 | 3 | 5 | 5 | 4 | 5 | 5 | 3 | 5 | 5 |
| 25 | 4 | 5 | 5 | 4 | 4 | 4 | 4 | 4 | 4 | 5 | 4 | 5 | 4 |
| 26 | 4 | 4 | 4 | 4 | 5 | 4 | 4 | 4 | 4 | 4 | 3 | 3 | 4 |
| 27 | 3 | 3 | 5 | 4 | 4 | 5 | 3 | 5 | 4 | 4 | 4 | 4 | 4 |
| 28 | 5 | 3 | 4 | 4 | 4 | 4 | 4 | 5 | 4 | 5 | 5 | 5 | 4 |
| 29 | 5 | 4 | 5 | 5 | 5 | 5 | 4 | 5 | 4 | 5 | 5 | 5 | 5 |
| 30 | 4 | 4 | 4 | 5 | 5 | 5 | 5 | 4 | 3 | 5 | 5 | 5 | 5 |
| 31 | 4 | 4 | 4 | 4 | 5 | 5 | 5 | 5 | 5 | 5 | 5 | 5 | 4 |
| 32 | 3 | 5 | 4 | 4 | 5 | 5 | 4 | 5 | 5 | 5 | 5 | 5 | 4 |
| 33 | 4 | 5 | 4 | 5 | 5 | 5 | 4 | 5 | 5 | 5 | 5 | 5 | 5 |
| 34 | 3 | 3 | 5 | 5 | 5 | 5 | 4 | 5 | 5 | 3 | 3 | 5 | 5 |
| 35 | 4 | 4 | 4 | 3 | 5 | 5 | 5 | 5 | 5 | 3 | 3 | 5 | 3 |
| 36 | 3 | 4 | 5 | 5 | 5 | 5 | 5 | 5 | 5 | 4 | 4 | 4 | 5 |
| 37 | 5 | 4 | 4 | 4 | 5 | 5 | 3 | 5 | 3 | 3 | 5 | 4 | 4 |
| 38 | 4 | 5 | 4 | 4 | 5 | 3 | 3 | 3 | 5 | 5 | 5 | 4 | 4 |
| 39 | 4 | 5 | 3 | 5 | 4 | 4 | 3 | 3 | 5 | 5 | 4 | 4 | 5 |
| 40 | 3 | 4 | 3 | 5 | 5 | 4 | 4 | 4 | 5 | 3 | 3 | 5 | 5 |
| 41 | 4 | 4 | 4 | 3 | 5 | 5 | 5 | 5 | 4 | 5 | 3 | 4 | 3 |
| 42 | 4 | 4 | 5 | 3 | 5 | 5 | 5 | 5 | 5 | 5 | 4 | 5 | 3 |
| 43 | 5 | 5 | 4 | 4 | 4 | 5 | 5 | 5 | 4 | 4 | 4 | 4 | 4 |
| 44 | 4 | 5 | 5 | 5 | 4 | 5 | 5 | 5 | 4 | 4 | 4 | 4 | 5 |
| 45 | 4 | 3 | 5 | 5 | 4 | 5 | 5 | 5 | 5 | 3 | 5 | 4 | 5 |
| 46 | 5 | 4 | 3 | 4 | 4 | 5 | 5 | 5 | 4 | 4 | 5 | 4 | 4 |
| 47 | 3 | 4 | 4 | 4 | 4 | 5 | 5 | 5 | 5 | 4 | 5 | 4 | 4 |
| 48 | 4 | 4 | 5 | 4 | 5 | 5 | 4 | 4 | 5 | 5 | 4 | 3 | 4 |
| 49 | 4 | 5 | 4 | 4 | 4 | 4 | 4 | 5 | 5 | 5 | 3 | 3 | 4 |
| 50 | 4 | 5 | 5 | 3 | 3 | 5 | 4 | 5 | 5 | 4 | 3 | 4 | 3 |
| 51 | 3 | 3 | 5 | 5 | 3 | 4 | 4 | 5 | 5 | 4 | 5 | 4 | 5 |
| 52 | 3 | 3 | 5 | 5 | 4 | 5 | 5 | 5 | 5 | 4 | 4 | 5 | 5 |
| 53 | 4 | 4 | 4 | 4 | 4 | 4 | 5 | 5 | 5 | 3 | 5 | 3 | 4 |
| 54 | 3 | 5 | 4 | 4 | 4 | 4 | 4 | 5 | 5 | 4 | 4 | 4 | 4 |
| 55 | 5 | 5 | 4 | 5 | 3 | 4 | 4 | 5 | 5 | 5 | 4 | 4 | 5 |
| 56 | 5 | 4 | 4 | 5 | 5 | 4 | 4 | 5 | 5 | 5 | 5 | 5 | 5 |
| 57 | 4 | 4 | 4 | 3 | 4 | 5 | 4 | 5 | 5 | 5 | 5 | 5 | 3 |
| 58 | 5 | 4 | 5 | 4 | 3 | 3 | 4 | 5 | 5 | 5 | 5 | 5 | 4 |
| 59 | 4 | 4 | 4 | 5 | 4 | 4 | 5 | 5 | 5 | 5 | 5 | 5 | 5 |
| 60 | 5 | 3 | 5 | 3 | 3 | 4 | 4 | 3 | 4 | 5 | 5 | 5 | 3 |
| 61 | 4 | 4 | 4 | 4 | 5 | 4 | 5 | 5 | 4 | 5 | 5 | 5 | 4 |
| 62 | 4 | 5 | 4 | 3 | 4 | 5 | 4 | 4 | 4 | 5 | 5 | 5 | 3 |
| 63 | 4 | 5 | 4 | 4 | 4 | 5 | 5 | 4 | 4 | 5 | 5 | 5 | 4 |
| 64 | 5 | 4 | 4 | 3 | 4 | 3 | 5 | 5 | 5 | 3 | 4 | 4 | 3 |
| 65 | 5 | 4 | 4 | 5 | 5 | 4 | 3 | 5 | 5 | 4 | 4 | 4 | 5 |
| 66 | 4 | 4 | 5 | 5 | 3 | 4 | 4 | 4 | 5 | 4 | 5 | 3 | 5 |
| 67 | 4 | 4 | 4 | 4 | 4 | 4 | 5 | 5 | 4 | 5 | 5 | 4 | 4 |
| 68 | 4 | 3 | 3 | 4 | 4 | 5 | 4 | 3 | 5 | 5 | 5 | 5 | 4 |
| 69 | 3 | 5 | 3 | 3 | 4 | 5 | 5 | 4 | 5 | 5 | 5 | 3 | 3 |
| 70 | 4 | 5 | 4 | 4 | 3 | 3 | 5 | 4 | 5 | 5 | 4 | 4 | 4 |
| 71 | 5 | 4 | 4 | 3 | 3 | 3 | 5 | 5 | 5 | 5 | 4 | 3 | 3 |
| 72 | 4 | 4 | 4 | 4 | 4 | 4 | 4 | 5 | 5 | 5 | 4 | 4 | 4 |
| 73 | 5 | 3 | 5 | 5 | 3 | 5 | 4 | 5 | 5 | 5 | 4 | 3 | 5 |
| 74 | 5 | 4 | 5 | 5 | 4 | 4 | 5 | 5 | 5 | 5 | 4 | 5 | 5 |
| 75 | 4 | 3 | 3 | 4 | 4 | 4 | 4 | 5 | 5 | 5 | 5 | 5 | 4 |
| 76 | 4 | 4 | 4 | 5 | 5 | 3 | 5 | 5 | 5 | 5 | 4 | 4 | 5 |
| 77 | 5 | 3 | 4 | 5 | 5 | 4 | 5 | 5 | 5 | 5 | 5 | 5 | 4 |
| 78 | 5 | 5 | 4 | 5 | 4 | 3 | 3 | 5 | 5 | 5 | 4 | 4 | 4 |
| 79 | 3 | 4 | 5 | 5 | 4 | 4 | 4 | 4 | 4 | 5 | 4 | 3 | 4 |
| 80 | 4 | 5 | 5 | 4 | 5 | 3 | 4 | 3 | 4 | 3 | 5 | 4 | 4 |
| 81 | 5 | 5 | 5 | 5 | 5 | 5 | 4 | 5 | 5 | 4 | 3 | 4 | 5 |
| 82 | 3 | 5 | 5 | 4 | 3 | 4 | 5 | 5 | 3 | 4 | 4 | 5 | 4 |
| 83 | 4 | 5 | 5 | 5 | 5 | 4 | 5 | 4 | 4 | 4 | 5 | 5 | 5 |
| 84 | 3 | 5 | 5 | 4 | 4 | 4 | 4 | 4 | 4 | 5 | 4 | 3 | 4 |
| 85 | 4 | 5 | 5 | 3 | 5 | 4 | 4 | 5 | 5 | 4 | 5 | 5 | 5 |
| 86 | 3 | 5 | 5 | 3 | 4 | 4 | 4 | 3 | 4 | 5 | 5 | 5 | 5 |
| 87 | 5 | 5 | 5 | 4 | 5 | 4 | 5 | 4 | 3 | 3 | 5 | 5 | 5 |
| 88 | 5 | 4 | 4 | 5 | 4 | 4 | 4 | 5 | 4 | 4 | 5 | 5 | 5 |
| 89 | 4 | 5 | 5 | 4 | 5 | 3 | 5 | 3 | 3 | 4 | 5 | 5 | 5 |
| 90 | 5 | 4 | 5 | 5 | 4 | 4 | 4 | 4 | 5 | 4 | 5 | 5 | 5 |
| 91 | 4 | 4 | 3 | 5 | 4 | 5 | 4 | 3 | 4 | 5 | 5 | 5 | 5 |
| 92 | 5 | 5 | 4 | 3 | 4 | 5 | 4 | 4 | 4 | 5 | 5 | 5 | 5 |
| 93 | 4 | 5 | 5 | 4 | 5 | 4 | 4 | 3 | 4 | 3 | 5 | 5 | 4 |
| 94 | 4 | 5 | 5 | 5 | 5 | 4 | 4 | 5 | 5 | 4 | 3 | 5 | 5 |
| 95 | 4 | 5 | 5 | 4 | 4 | 4 | 5 | 5 | 3 | 4 | 4 | 4 | 4 |
| 96 | 4 | 5 | 5 | 5 | 4 | 4 | 4 | 4 | 4 | 4 | 5 | 5 | 5 |
| 97 | 3 | 5 | 5 | 5 | 4 | 3 | 3 | 4 | 4 | 5 | 4 | 3 | 5 |
| 98 | 5 | 5 | 5 | 3 | 4 | 5 | 4 | 5 | 3 | 4 | 4 | 4 | 3 |
| 99 | 5 | 5 | 5 | 4 | 3 | 3 | 5 | 5 | 5 | 4 | 4 | 5 | 4 |
| 100 | 4 | 5 | 5 | 5 | 4 | 4 | 4 | 3 | 4 | 5 | 5 | 4 | 5 |
| 101 | 4 | 5 | 5 | 4 | 3 | 4 | 5 | 5 | 4 | 5 | 5 | 5 | 4 |
| 102 | 3 | 4 | 5 | 5 | 5 | 4 | 4 | 4 | 4 | 4 | 3 | 5 | 5 |
| 103 | 4 | 3 | 3 | 5 | 4 | 5 | 4 | 4 | 5 | 3 | 3 | 3 | 5 |
| 104 | 3 | 3 | 3 | 5 | 4 | 5 | 3 | 5 | 4 | 4 | 3 | 3 | 5 |
| 105 | 4 | 4 | 4 | 4 | 3 | 4 | 3 | 5 | 5 | 4 | 4 | 4 | 4 |
| 106 | 5 | 3 | 5 | 4 | 4 | 4 | 4 | 3 | 5 | 3 | 3 | 4 | 4 |
| 107 | 4 | 5 | 5 | 4 | 4 | 4 | 5 | 3 | 5 | 3 | 5 | 3 | 4 |
| 108 | 4 | 5 | 4 | 4 | 5 | 5 | 4 | 4 | 4 | 4 | 5 | 4 | 4 |
| 109 | 5 | 5 | 4 | 4 | 5 | 4 | 5 | 5 | 5 | 4 | 5 | 4 | 4 |
| 110 | 5 | 5 | 4 | 5 | 5 | 3 | 5 | 5 | 5 | 4 | 4 | 4 | 5 |
| 111 | 5 | 5 | 5 | 5 | 4 | 3 | 5 | 5 | 4 | 5 | 4 | 4 | 5 |
| 112 | 5 | 5 | 3 | 5 | 4 | 4 | 5 | 5 | 5 | 5 | 3 | 5 | 5 |
| 113 | 5 | 5 | 3 | 5 | 4 | 5 | 5 | 5 | 3 | 5 | 4 | 5 | 5 |
| 114 | 5 | 5 | 4 | 4 | 5 | 4 | 5 | 5 | 3 | 5 | 3 | 3 | 4 |
| 115 | 5 | 5 | 5 | 4 | 5 | 5 | 5 | 5 | 4 | 4 | 4 | 4 | 4 |
| 116 | 5 | 5 | 5 | 4 | 3 | 5 | 5 | 5 | 5 | 4 | 3 | 4 | 4 |
| 117 | 5 | 5 | 4 | 4 | 3 | 5 | 5 | 5 | 5 | 4 | 5 | 4 | 4 |
| 118 | 3 | 4 | 4 | 4 | 4 | 4 | 4 | 5 | 4 | 4 | 4 | 5 | 4 |
| 119 | 5 | 5 | 4 | 5 | 5 | 4 | 3 | 4 | 4 | 4 | 4 | 4 | 5 |
| 120 | 5 | 4 | 4 | 4 | 5 | 4 | 5 | 5 | 4 | 5 | 5 | 5 | 5 |
| 121 | 4 | 5 | 3 | 5 | 4 | 4 | 5 | 4 | 4 | 4 | 5 | 5 | 5 |
| 122 | 5 | 4 | 4 | 4 | 4 | 4 | 4 | 5 | 3 | 5 | 5 | 5 | 5 |
| 123 | 4 | 4 | 5 | 4 | 4 | 3 | 3 | 5 | 4 | 4 | 5 | 5 | 5 |
| 124 | 5 | 4 | 5 | 4 | 4 | 4 | 4 | 4 | 4 | 5 | 4 | 3 | 4 |
| 125 | 4 | 5 | 4 | 4 | 5 | 3 | 4 | 3 | 4 | 3 | 5 | 4 | 4 |
| 126 | 4 | 5 | 4 | 4 | 5 | 5 | 4 | 5 | 5 | 4 | 3 | 4 | 4 |
| 127 | 5 | 4 | 4 | 5 | 5 | 5 | 5 | 5 | 3 | 4 | 4 | 5 | 5 |
| 128 | 4 | 4 | 4 | 4 | 5 | 5 | 5 | 4 | 4 | 4 | 5 | 5 | 4 |
| 129 | 5 | 5 | 5 | 5 | 5 | 5 | 4 | 4 | 4 | 5 | 4 | 3 | 5 |
| 130 | 4 | 5 | 5 | 5 | 5 | 5 | 4 | 5 | 5 | 4 | 4 | 4 | 5 |
| 131 | 4 | 4 | 5 | 5 | 5 | 5 | 4 | 3 | 4 | 5 | 4 | 4 | 3 |
| 132 | 4 | 4 | 5 | 5 | 5 | 5 | 5 | 4 | 5 | 5 | 4 | 5 | 4 |
| 133 | 4 | 5 | 5 | 5 | 5 | 5 | 4 | 5 | 5 | 5 | 5 | 5 | 4 |
| 134 | 5 | 5 | 5 | 5 | 5 | 3 | 5 | 3 | 5 | 5 | 4 | 3 | 4 |
| 135 | 4 | 3 | 5 | 5 | 4 | 3 | 4 | 5 | 5 | 5 | 4 | 4 | 5 |
| 136 | 5 | 5 | 5 | 5 | 4 | 4 | 5 | 4 | 5 | 5 | 3 | 5 | 5 |
| 137 | 4 | 4 | 4 | 4 | 4 | 5 | 3 | 3 | 5 | 5 | 4 | 5 | 4 |
| 138 | 4 | 4 | 5 | 5 | 3 | 4 | 4 | 4 | 5 | 5 | 5 | 3 | 5 |
| 139 | 4 | 4 | 4 | 4 | 4 | 4 | 5 | 5 | 5 | 5 | 5 | 4 | 4 |
| 140 | 4 | 3 | 3 | 4 | 4 | 5 | 4 | 3 | 5 | 5 | 5 | 5 | 4 |
| 141 | 3 | 5 | 3 | 3 | 4 | 5 | 5 | 4 | 3 | 3 | 5 | 3 | 3 |
| 142 | 4 | 5 | 4 | 4 | 3 | 3 | 5 | 4 | 4 | 4 | 4 | 4 | 4 |
| 143 | 5 | 4 | 4 | 3 | 3 | 3 | 5 | 3 | 3 | 5 | 4 | 3 | 3 |

| **EXPERIMENT CLASS** | | | | | | | | | | | | |  |
| --- | --- | --- | --- | --- | --- | --- | --- | --- | --- | --- | --- | --- | --- |
| Respondent | ENVIRONMENTAL AWARENESS | | | | | | | | | | | | |
| Environmental Practices | | | | Environmental Attitudes | | | | Noble Values of Sustainability | | | | |
| student comprehending the meanings of environmental issues | being in charge of environmental problems at one’s place | discussing about environmental problems with others | getting involved in environmental awareness activities | student feeling dissapointed with air pollution | feeling dissapointed with river pollution | appreciating biodiversity | awaring of being responsibility towards environment | student trying to reduce amount of waste by collecting materials recycled | not using plastic bag to wrap things | conserving the use of electric energy | conserving the use of water supply | composting the food residue to become fertilizer |
| 1 | 5 | 5 | 5 | 4 | 5 | 5 | 5 | 5 | 4 | 5 | 5 | 5 | 5 |
| 2 | 4 | 4 | 5 | 5 | 5 | 5 | 4 | 5 | 5 | 5 | 4 | 5 | 3 |
| 3 | 4 | 4 | 4 | 5 | 5 | 5 | 4 | 5 | 5 | 4 | 5 | 5 | 3 |
| 4 | 5 | 5 | 4 | 5 | 5 | 5 | 4 | 5 | 5 | 3 | 3 | 5 | 5 |
| 5 | 5 | 5 | 3 | 5 | 5 | 5 | 5 | 5 | 5 | 3 | 3 | 5 | 4 |
| 6 | 5 | 5 | 4 | 5 | 5 | 3 | 5 | 5 | 5 | 4 | 4 | 4 | 5 |
| 7 | 5 | 5 | 5 | 5 | 5 | 5 | 3 | 5 | 3 | 3 | 5 | 4 | 4 |
| 8 | 5 | 5 | 5 | 5 | 5 | 5 | 3 | 5 | 3 | 5 | 5 | 4 | 3 |
| 9 | 5 | 5 | 5 | 5 | 5 | 5 | 4 | 4 | 4 | 5 | 5 | 5 | 3 |
| 10 | 5 | 5 | 5 | 5 | 5 | 5 | 5 | 4 | 3 | 4 | 5 | 5 | 4 |
| 11 | 5 | 5 | 5 | 5 | 4 | 4 | 5 | 4 | 5 | 5 | 5 | 5 | 3 |
| 12 | 5 | 5 | 5 | 5 | 5 | 4 | 4 | 4 | 4 | 5 | 5 | 5 | 5 |
| 13 | 4 | 5 | 5 | 5 | 4 | 5 | 4 | 4 | 4 | 4 | 3 | 3 | 5 |
| 14 | 4 | 5 | 5 | 4 | 5 | 5 | 3 | 5 | 4 | 4 | 4 | 4 | 4 |
| 15 | 4 | 5 | 5 | 3 | 3 | 5 | 4 | 5 | 4 | 5 | 3 | 4 | 3 |
| 16 | 5 | 5 | 5 | 3 | 3 | 5 | 5 | 5 | 5 | 5 | 5 | 4 | 3 |
| 17 | 5 | 5 | 4 | 4 | 4 | 4 | 5 | 5 | 4 | 3 | 4 | 5 | 4 |
| 18 | 3 | 5 | 3 | 3 | 5 | 4 | 5 | 5 | 5 | 5 | 4 | 5 | 3 |
| 19 | 3 | 5 | 3 | 5 | 5 | 4 | 5 | 5 | 4 | 4 | 4 | 4 | 5 |
| 20 | 4 | 4 | 4 | 5 | 4 | 4 | 5 | 5 | 5 | 4 | 4 | 4 | 5 |
| 21 | 5 | 4 | 3 | 4 | 4 | 4 | 5 | 5 | 4 | 4 | 5 | 4 | 4 |
| 22 | 5 | 4 | 5 | 5 | 4 | 5 | 5 | 5 | 5 | 4 | 4 | 4 | 5 |
| 23 | 4 | 4 | 5 | 4 | 4 | 4 | 5 | 3 | 4 | 4 | 4 | 4 | 4 |
| 24 | 4 | 4 | 4 | 5 | 3 | 5 | 5 | 4 | 5 | 5 | 3 | 5 | 5 |
| 25 | 4 | 5 | 5 | 4 | 4 | 4 | 4 | 4 | 4 | 5 | 4 | 5 | 4 |
| 26 | 4 | 4 | 4 | 4 | 5 | 4 | 4 | 4 | 4 | 4 | 3 | 3 | 4 |
| 27 | 3 | 3 | 5 | 4 | 4 | 5 | 3 | 5 | 4 | 4 | 4 | 4 | 4 |
| 28 | 5 | 3 | 4 | 4 | 4 | 4 | 4 | 5 | 4 | 5 | 5 | 5 | 4 |
| 29 | 5 | 4 | 5 | 5 | 5 | 5 | 4 | 5 | 4 | 5 | 5 | 5 | 5 |
| 30 | 4 | 4 | 4 | 5 | 5 | 5 | 5 | 4 | 3 | 5 | 5 | 5 | 5 |
| 31 | 4 | 4 | 4 | 4 | 5 | 5 | 5 | 5 | 5 | 5 | 3 | 5 | 4 |
| 32 | 3 | 5 | 4 | 4 | 5 | 5 | 4 | 5 | 3 | 5 | 5 | 5 | 4 |
| 33 | 4 | 5 | 4 | 5 | 5 | 5 | 4 | 5 | 5 | 5 | 3 | 5 | 5 |
| 34 | 3 | 3 | 5 | 5 | 5 | 5 | 4 | 5 | 5 | 3 | 3 | 5 | 5 |
| 35 | 4 | 4 | 4 | 3 | 5 | 5 | 5 | 5 | 5 | 3 | 3 | 5 | 3 |
| 36 | 3 | 4 | 5 | 5 | 5 | 5 | 5 | 5 | 5 | 4 | 4 | 4 | 5 |
| 37 | 5 | 4 | 4 | 4 | 5 | 5 | 3 | 5 | 3 | 3 | 5 | 4 | 4 |
| 38 | 4 | 5 | 4 | 4 | 5 | 3 | 3 | 3 | 5 | 5 | 5 | 4 | 4 |
| 39 | 4 | 5 | 3 | 5 | 4 | 4 | 3 | 3 | 5 | 5 | 4 | 4 | 5 |
| 40 | 3 | 4 | 3 | 5 | 5 | 4 | 4 | 4 | 5 | 3 | 3 | 5 | 5 |
| 41 | 4 | 4 | 4 | 3 | 5 | 5 | 5 | 5 | 4 | 5 | 3 | 4 | 3 |
| 42 | 4 | 4 | 5 | 3 | 5 | 5 | 5 | 5 | 5 | 5 | 4 | 5 | 3 |
| 43 | 5 | 5 | 4 | 4 | 4 | 5 | 5 | 5 | 4 | 4 | 4 | 4 | 4 |
| 44 | 4 | 5 | 5 | 5 | 4 | 5 | 5 | 5 | 4 | 4 | 4 | 4 | 5 |
| 45 | 4 | 3 | 5 | 5 | 4 | 5 | 5 | 5 | 5 | 3 | 5 | 4 | 5 |
| 46 | 5 | 4 | 3 | 4 | 4 | 5 | 5 | 5 | 4 | 4 | 5 | 4 | 4 |
| 47 | 3 | 4 | 4 | 4 | 4 | 5 | 5 | 5 | 5 | 4 | 5 | 4 | 4 |
| 48 | 4 | 4 | 5 | 4 | 5 | 5 | 4 | 4 | 5 | 5 | 4 | 3 | 4 |
| 49 | 4 | 5 | 4 | 4 | 4 | 4 | 4 | 5 | 5 | 5 | 3 | 3 | 4 |
| 50 | 4 | 5 | 5 | 3 | 3 | 5 | 4 | 5 | 5 | 4 | 3 | 4 | 3 |
| 51 | 3 | 3 | 5 | 5 | 3 | 4 | 4 | 5 | 5 | 4 | 5 | 4 | 5 |
| 52 | 3 | 3 | 5 | 5 | 4 | 5 | 5 | 5 | 5 | 4 | 4 | 5 | 5 |
| 53 | 4 | 4 | 4 | 4 | 4 | 4 | 5 | 5 | 5 | 3 | 5 | 3 | 4 |
| 54 | 3 | 5 | 4 | 4 | 4 | 4 | 4 | 5 | 5 | 4 | 4 | 4 | 4 |
| 55 | 5 | 5 | 4 | 5 | 3 | 4 | 4 | 5 | 5 | 5 | 4 | 4 | 5 |
| 56 | 5 | 4 | 4 | 5 | 5 | 4 | 4 | 5 | 5 | 5 | 5 | 5 | 5 |
| 57 | 4 | 4 | 4 | 3 | 4 | 5 | 4 | 5 | 5 | 5 | 5 | 5 | 3 |
| 58 | 5 | 4 | 5 | 4 | 3 | 3 | 4 | 5 | 5 | 5 | 5 | 5 | 4 |
| 59 | 4 | 4 | 4 | 5 | 4 | 4 | 5 | 5 | 5 | 5 | 5 | 5 | 5 |
| 60 | 5 | 3 | 5 | 3 | 3 | 4 | 4 | 3 | 4 | 5 | 5 | 5 | 3 |
| 61 | 4 | 4 | 4 | 4 | 5 | 4 | 5 | 5 | 4 | 5 | 5 | 5 | 4 |
| 62 | 4 | 5 | 4 | 3 | 4 | 5 | 4 | 4 | 4 | 5 | 5 | 5 | 3 |
| 63 | 4 | 5 | 4 | 4 | 4 | 5 | 5 | 4 | 4 | 5 | 5 | 5 | 4 |
| 64 | 5 | 4 | 4 | 3 | 4 | 3 | 5 | 5 | 5 | 3 | 4 | 4 | 3 |
| 65 | 5 | 4 | 4 | 5 | 5 | 4 | 3 | 5 | 5 | 4 | 4 | 4 | 5 |
| 66 | 4 | 4 | 5 | 5 | 3 | 4 | 4 | 4 | 5 | 4 | 5 | 3 | 5 |
| 67 | 4 | 4 | 4 | 4 | 4 | 4 | 5 | 5 | 4 | 5 | 5 | 4 | 4 |
| 68 | 4 | 3 | 3 | 4 | 4 | 5 | 4 | 3 | 5 | 5 | 5 | 5 | 4 |
| 69 | 3 | 5 | 3 | 3 | 4 | 5 | 5 | 4 | 5 | 5 | 5 | 3 | 3 |
| 70 | 4 | 5 | 4 | 4 | 3 | 3 | 5 | 4 | 5 | 5 | 4 | 4 | 4 |
| 71 | 5 | 4 | 4 | 3 | 3 | 3 | 5 | 5 | 5 | 5 | 4 | 3 | 3 |
| 72 | 4 | 4 | 4 | 4 | 4 | 4 | 4 | 5 | 5 | 5 | 4 | 4 | 4 |
| 73 | 5 | 3 | 5 | 5 | 3 | 5 | 4 | 5 | 5 | 5 | 4 | 3 | 5 |
| 74 | 5 | 4 | 5 | 5 | 4 | 4 | 5 | 5 | 5 | 5 | 4 | 5 | 5 |
| 75 | 4 | 3 | 3 | 4 | 4 | 4 | 4 | 5 | 5 | 5 | 5 | 5 | 4 |
| 76 | 4 | 4 | 4 | 5 | 5 | 3 | 5 | 5 | 5 | 5 | 4 | 4 | 5 |
| 77 | 5 | 3 | 4 | 5 | 5 | 4 | 5 | 5 | 5 | 5 | 5 | 5 | 4 |
| 78 | 5 | 5 | 4 | 5 | 4 | 3 | 3 | 5 | 5 | 5 | 4 | 4 | 4 |
| 79 | 3 | 4 | 5 | 5 | 4 | 4 | 4 | 4 | 4 | 5 | 4 | 3 | 4 |
| 80 | 4 | 5 | 5 | 4 | 5 | 3 | 4 | 3 | 4 | 3 | 5 | 4 | 4 |
| 81 | 5 | 5 | 5 | 5 | 5 | 5 | 4 | 5 | 5 | 4 | 3 | 4 | 5 |
| 82 | 3 | 5 | 5 | 4 | 3 | 4 | 5 | 5 | 3 | 4 | 4 | 5 | 4 |
| 83 | 4 | 5 | 5 | 5 | 5 | 4 | 5 | 4 | 4 | 4 | 5 | 5 | 5 |
| 84 | 3 | 5 | 5 | 4 | 4 | 4 | 4 | 4 | 4 | 5 | 4 | 3 | 4 |
| 85 | 4 | 5 | 5 | 3 | 5 | 4 | 4 | 5 | 5 | 4 | 5 | 5 | 5 |
| 86 | 3 | 5 | 5 | 3 | 4 | 4 | 4 | 3 | 4 | 5 | 5 | 5 | 5 |
| 87 | 5 | 5 | 5 | 4 | 5 | 4 | 5 | 4 | 3 | 3 | 5 | 5 | 5 |
| 88 | 5 | 4 | 4 | 5 | 4 | 4 | 4 | 5 | 4 | 4 | 5 | 5 | 5 |
| 89 | 4 | 5 | 5 | 4 | 5 | 3 | 5 | 3 | 3 | 4 | 5 | 5 | 5 |
| 90 | 5 | 4 | 5 | 5 | 4 | 4 | 4 | 4 | 5 | 4 | 5 | 5 | 5 |
| 91 | 4 | 4 | 3 | 5 | 4 | 5 | 4 | 3 | 4 | 5 | 5 | 5 | 5 |
| 92 | 5 | 5 | 4 | 3 | 4 | 5 | 4 | 4 | 4 | 5 | 5 | 5 | 5 |
| 93 | 4 | 5 | 5 | 4 | 5 | 4 | 4 | 3 | 4 | 3 | 5 | 5 | 4 |
| 94 | 4 | 5 | 5 | 5 | 5 | 4 | 4 | 5 | 5 | 4 | 3 | 5 | 5 |
| 95 | 4 | 5 | 5 | 4 | 4 | 4 | 5 | 5 | 3 | 4 | 4 | 4 | 4 |
| 96 | 4 | 5 | 5 | 5 | 4 | 4 | 4 | 4 | 4 | 4 | 5 | 5 | 5 |
| 97 | 3 | 5 | 5 | 5 | 4 | 3 | 3 | 4 | 4 | 5 | 4 | 3 | 5 |
| 98 | 5 | 5 | 5 | 3 | 4 | 5 | 4 | 5 | 3 | 4 | 4 | 4 | 3 |
| 99 | 5 | 5 | 5 | 4 | 3 | 3 | 5 | 5 | 5 | 4 | 4 | 5 | 4 |
| 100 | 4 | 5 | 5 | 5 | 4 | 4 | 4 | 3 | 4 | 5 | 5 | 4 | 5 |
| 101 | 4 | 5 | 5 | 4 | 3 | 4 | 5 | 5 | 4 | 5 | 5 | 5 | 4 |
| 102 | 3 | 4 | 5 | 5 | 5 | 4 | 4 | 4 | 4 | 4 | 3 | 5 | 5 |
| 103 | 4 | 3 | 3 | 5 | 4 | 5 | 4 | 4 | 5 | 4 | 4 | 5 | 5 |
| 104 | 3 | 3 | 3 | 5 | 4 | 5 | 3 | 5 | 4 | 4 | 3 | 3 | 5 |
| 105 | 4 | 4 | 4 | 4 | 3 | 4 | 3 | 5 | 5 | 4 | 4 | 4 | 4 |
| 106 | 5 | 3 | 5 | 4 | 4 | 4 | 4 | 3 | 5 | 3 | 3 | 4 | 4 |
| 107 | 4 | 5 | 5 | 4 | 4 | 4 | 5 | 3 | 5 | 3 | 5 | 3 | 4 |
| 108 | 4 | 5 | 4 | 4 | 5 | 5 | 4 | 4 | 4 | 4 | 5 | 4 | 4 |
| 109 | 5 | 5 | 4 | 4 | 5 | 4 | 5 | 5 | 5 | 4 | 5 | 4 | 4 |
| 110 | 5 | 5 | 4 | 5 | 5 | 3 | 5 | 5 | 5 | 4 | 4 | 4 | 5 |
| 111 | 5 | 5 | 5 | 5 | 4 | 3 | 5 | 5 | 4 | 5 | 4 | 4 | 5 |
| 112 | 5 | 5 | 3 | 5 | 4 | 4 | 5 | 5 | 5 | 5 | 3 | 5 | 5 |
| 113 | 5 | 5 | 3 | 5 | 4 | 5 | 5 | 5 | 3 | 5 | 4 | 5 | 5 |
| 114 | 5 | 5 | 4 | 4 | 5 | 4 | 5 | 5 | 3 | 5 | 3 | 3 | 4 |
| 115 | 5 | 5 | 5 | 4 | 5 | 5 | 5 | 5 | 4 | 4 | 4 | 4 | 4 |
| 116 | 5 | 5 | 5 | 4 | 3 | 5 | 5 | 5 | 5 | 4 | 3 | 4 | 4 |
| 117 | 5 | 5 | 4 | 4 | 3 | 5 | 5 | 5 | 5 | 4 | 5 | 4 | 4 |
| 118 | 3 | 4 | 4 | 4 | 4 | 4 | 4 | 5 | 4 | 4 | 4 | 5 | 4 |
| 119 | 5 | 5 | 4 | 5 | 5 | 4 | 3 | 4 | 4 | 4 | 4 | 4 | 5 |
| 120 | 5 | 4 | 4 | 4 | 5 | 4 | 5 | 5 | 4 | 5 | 5 | 5 | 5 |
| 121 | 4 | 5 | 3 | 5 | 4 | 4 | 5 | 4 | 4 | 4 | 5 | 5 | 5 |
| 122 | 5 | 4 | 4 | 4 | 4 | 4 | 4 | 5 | 3 | 5 | 5 | 5 | 5 |
| 123 | 4 | 4 | 5 | 4 | 4 | 3 | 3 | 5 | 4 | 4 | 5 | 5 | 5 |
| 124 | 5 | 4 | 5 | 4 | 4 | 4 | 4 | 4 | 4 | 5 | 4 | 3 | 4 |
| 125 | 4 | 5 | 4 | 4 | 5 | 4 | 4 | 5 | 4 | 4 | 5 | 4 | 4 |
| 126 | 4 | 5 | 4 | 4 | 5 | 5 | 4 | 5 | 5 | 4 | 3 | 4 | 4 |
| 127 | 5 | 4 | 4 | 5 | 5 | 5 | 5 | 5 | 3 | 4 | 4 | 5 | 5 |
| 128 | 4 | 4 | 4 | 4 | 5 | 5 | 5 | 4 | 4 | 4 | 5 | 5 | 4 |
| 129 | 5 | 5 | 5 | 5 | 5 | 5 | 4 | 4 | 4 | 5 | 4 | 3 | 5 |
| 130 | 4 | 5 | 5 | 5 | 5 | 5 | 4 | 5 | 5 | 4 | 4 | 4 | 3 |
| 131 | 4 | 4 | 5 | 5 | 5 | 5 | 4 | 3 | 4 | 5 | 4 | 4 | 3 |
| 132 | 4 | 4 | 5 | 5 | 5 | 5 | 5 | 4 | 5 | 5 | 4 | 5 | 4 |
| 133 | 4 | 5 | 5 | 5 | 5 | 5 | 4 | 5 | 5 | 5 | 5 | 5 | 4 |
| 134 | 5 | 5 | 5 | 5 | 5 | 3 | 5 | 3 | 5 | 5 | 4 | 3 | 4 |
| 135 | 4 | 3 | 5 | 5 | 4 | 3 | 4 | 5 | 5 | 5 | 4 | 4 | 5 |
| 136 | 5 | 5 | 5 | 5 | 4 | 4 | 5 | 4 | 5 | 5 | 3 | 5 | 5 |
| 137 | 4 | 4 | 4 | 4 | 4 | 5 | 3 | 3 | 5 | 5 | 4 | 5 | 4 |
| 138 | 4 | 4 | 5 | 5 | 3 | 4 | 4 | 4 | 5 | 5 | 5 | 3 | 5 |
| 139 | 4 | 4 | 4 | 4 | 4 | 4 | 5 | 5 | 5 | 5 | 5 | 4 | 4 |
| 140 | 4 | 3 | 3 | 4 | 4 | 5 | 4 | 3 | 5 | 5 | 5 | 5 | 4 |
| 141 | 3 | 5 | 3 | 3 | 4 | 5 | 5 | 4 | 3 | 3 | 5 | 3 | 3 |
| 142 | 4 | 5 | 4 | 4 | 3 | 3 | 5 | 4 | 4 | 4 | 4 | 4 | 4 |
| 143 | 5 | 4 | 4 | 3 | 3 | 5 | 5 | 4 | 4 | 5 | 4 | 5 | 5 |
